# Supplementary material for: Pathogenic Prion Protein Isoforms Are Not Present in Cerebral Organoids Generated from Asymptomatic Donors Carrying the E200K Mutation Associated with Familial Prion Disease
Source: MDPI journal article supplement (doi:10.3390/pathogens9060482), 2020-06-18

Simote T Foliaki, Bradley R Groveman, Jue Yuan, Ryan Walters, Shulin Zhang, Paul Tesar, Wenquan Zou, Cathryn L Haigh. **Pathogenic prion protein isoforms are not present in cerebral organoids generated from asymptomatic donors carrying the E200K mutation associated with familial prion disease.**

**Supplementary Figure 1. E200K sequencing data.** Electropherogram data for donors with the E200K mutation also showing methionine homozygosity at codon 129 and the PrP reference sequence for comparison.

## E200K1

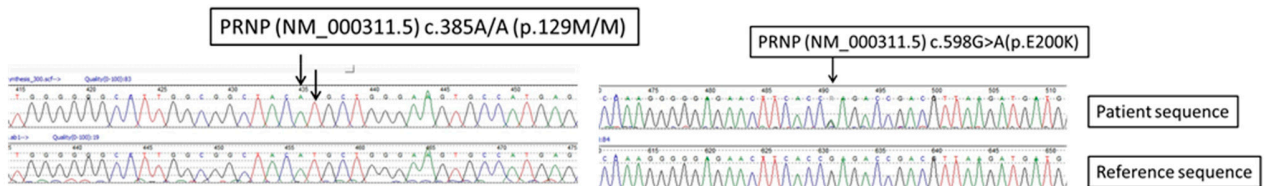

## E200K2

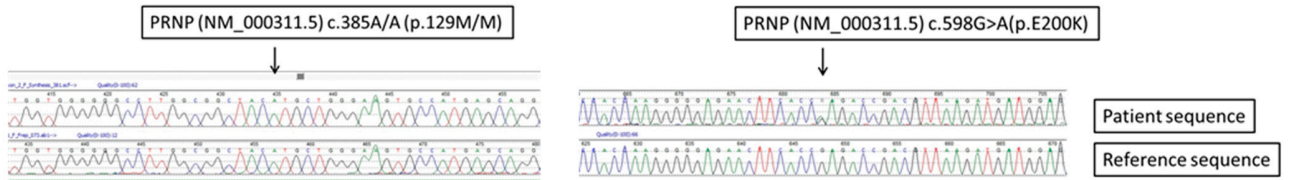

Supplement: s1 [file s1]
